# Supplementary material for: Formation of nanopores in DiynePC–DPPC complex lipid bilayers triggered by on-demand photo-polymerization
Source: Royal Society of Chemistry journal article supplement (doi:10.1039/c8ra04908d), 2018-01-01
Supplement: c8ra04908d1.pdf [file c8ra04908d1.pdf]

[Supporting Information]

## Formation of Nanopores in DiynePC-DPPC Complex Lipid Bilayers Triggered by On-Demand Photo-Polymerization

*Min Jung Chun, Yeol Kyo Choi, Dong June Ahn\**

Min Jung Chun, Yeol Kyo Choi and Prof. D. J. Ahn

Department of Chemical and Biological Engineering, Korea University, Seoul 02841, Republic  
of Korea

Prof. D. J. Ahn

KU-KIST Graduate School of Converging Science and Technology, Korea University, Seoul  
02841, Republic of Korea

M. J. Chun and Y. K. Choi contributed equally to this work.

\* Corresponding author.

E-mail address: [ahn@korea.ac.kr](mailto:ahn@korea.ac.kr) (D. J. Ahn)

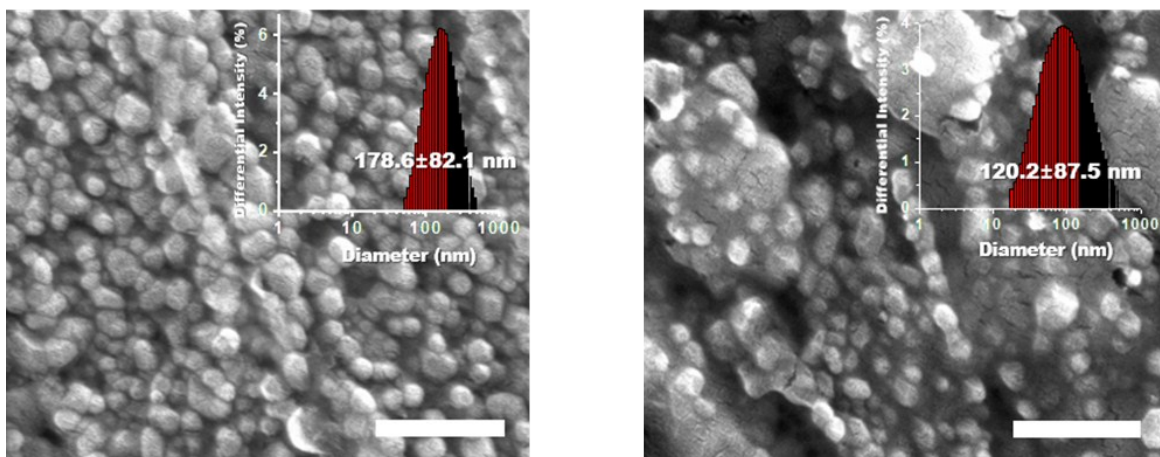

**Figure S1.** SEM images of DPPC/DiynePC vesicles (left) and DOPC/DiynePC vesicles (right); scale bar: 500 nm. (Insets show size distributions of both samples)

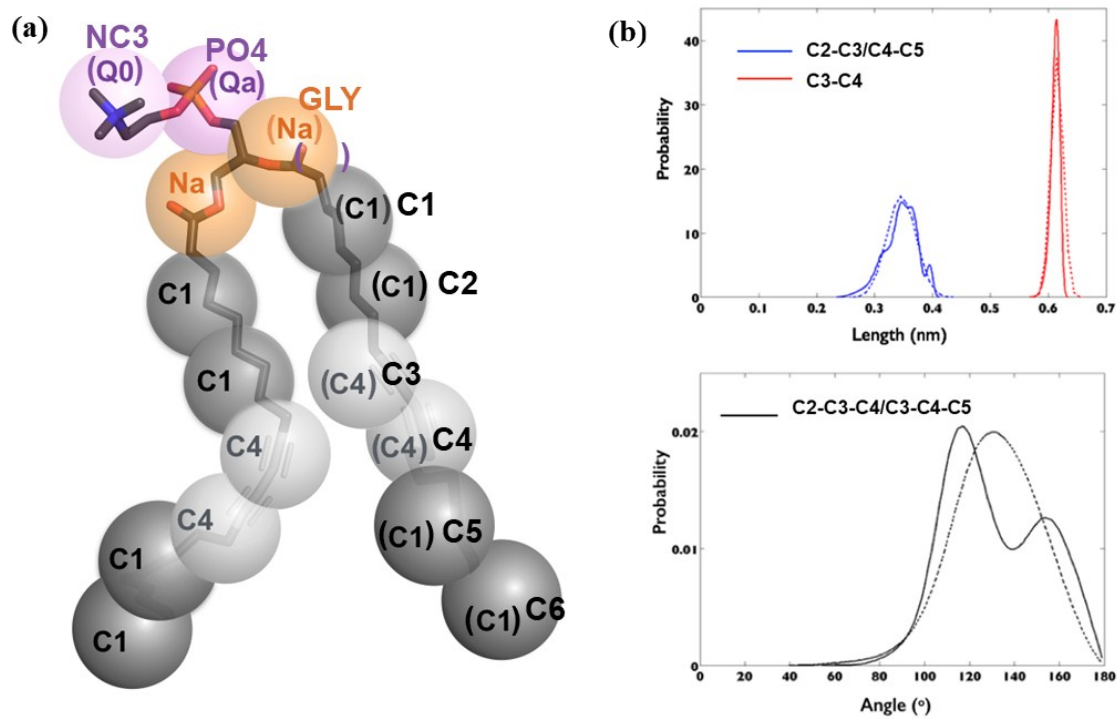

**Figure S2.** (a) CG mapping scheme (b) bond and angle distributions of DiynePC. Solid line and dotted line obtained from AA and CG simulation, respectively.

**Table S1.** Martini FF parameters for DiynePC

| <b>Bond</b>  | <b>Func. type</b> | <b><math>r_0</math>(nm)</b>       | <b><math>K_b</math>(kJ/mol nm<sup>2</sup>)</b> |
|--------------|-------------------|-----------------------------------|------------------------------------------------|
| C1-C4        | 1                 | 0.36                              | 6000                                           |
| C4-C4        | 1                 | 0.61                              | Const.                                         |
| <b>Angle</b> | <b>Func. type</b> | <b><math>\theta_0</math>(deg)</b> | <b><math>K_\theta</math>(kJ/mol)</b>           |
| C4-C4-C1     | 1                 | 140                               | 20                                             |
| C4-C1-C1     | 2                 | 180                               | 25                                             |

**Table S2.** Overview of the CG simulation setup.

| <b>Matrix lipid</b> | <b>Molar ratio of matrix/DiynePC</b> | <b>no. of matrix lipid</b> | <b>no. of DiynePC</b> | <b>no. of water<sup>a</sup></b> | <b>Simulation time (<math>\mu</math>s)</b> |
|---------------------|--------------------------------------|----------------------------|-----------------------|---------------------------------|--------------------------------------------|
| DPPC                | 2:1                                  | 2700                       | 1350                  | 30375                           | 5                                          |
| DOPC                | 2:1                                  | 2700                       | 1350                  | 30375                           | 5                                          |

<sup>a</sup>Number of CG water particles. The corresponding number of real water molecules is 4 times higher.

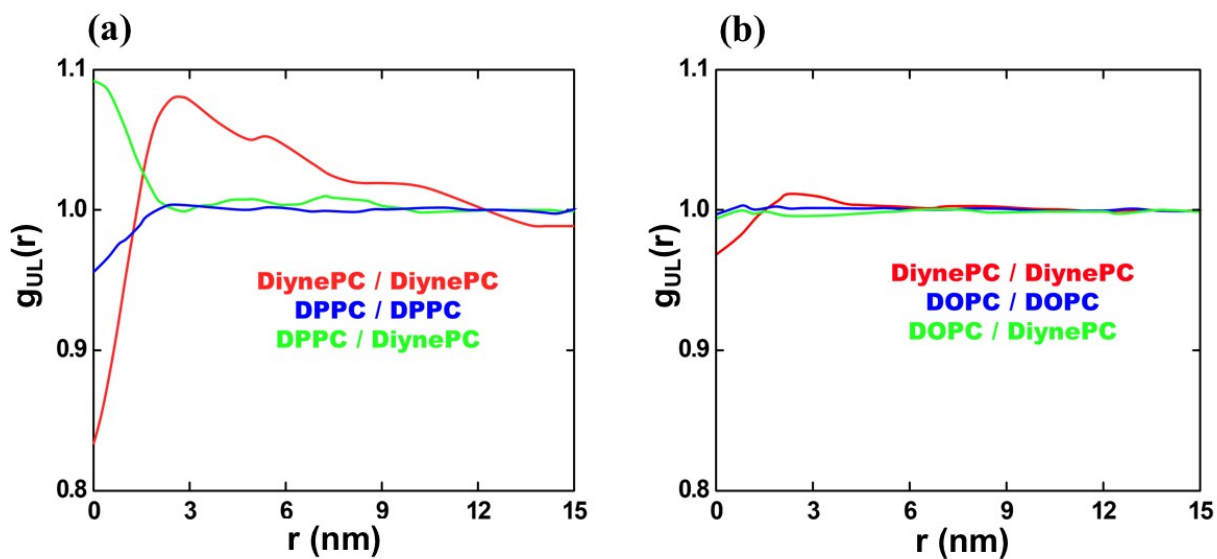

**Figure S3.** Radial distribution functions (RDFs) of glycerol centers of the lipids for the (a) DPPC/DiynePC (2:1) mixture and (b) DOPC/DiynePC (2:1) mixture; probability of occurrence of pair forms in DiynePC/DiynePC, matrix lipid/matrix lipid, and matrix lipid/DiynePC drawn compared to random mixing having RDF of 1. Radial distribution functions of glycerol centers of the lipids with different leaflets of the bilayer for the (c) DPPC/DiynePC and (d) DOPC/DiynePC.

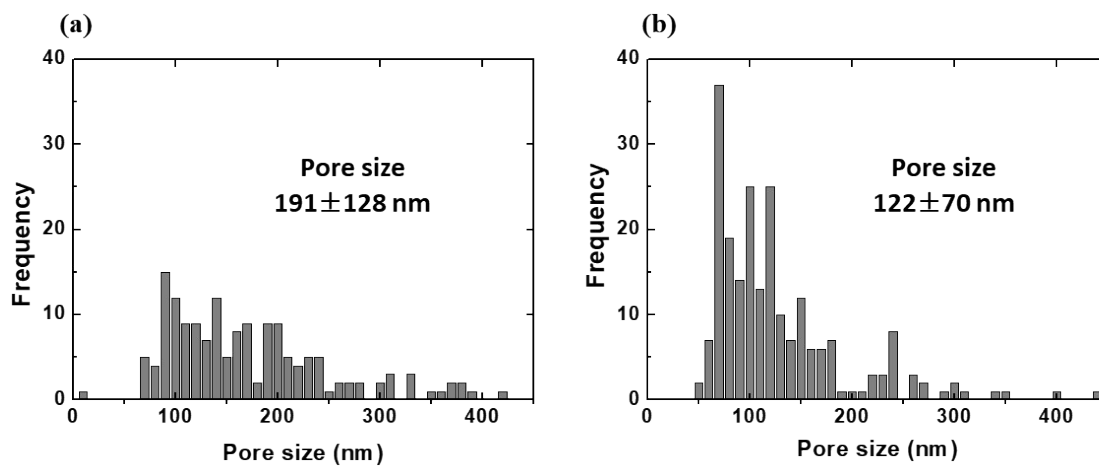

**Figure S4.** Size distribution histogram of pores on photo-polymerized bilayers of (a) DPPC/DiynPC (2:1) and (b) DPPC/DiynPC (4:1) mixtures.
